# Supplementary material
Source: publisher figshare collection journal article supplement (https://sage.figshare.com/ndownloader/files/17619080)

Electronic supplementary material for

**Direct detection of morphine in human urine by surface-ionization mass spectrometry**

D. T. Usmanov\*, Sh. Dj. Akhunov, U. Khasanov, V.M. Rotshteyn, B. Sh. Kasimov

Institute of Ion-Plasma and Laser Technologies, Durmon Yoli street 33, 100125, Tashkent, Uzbekistan

Correspondence to: Dilshadbek Usmanov ; [usmanov@iplt.uz](mailto:usmanov@iplt.uz)

## **Experimental condition of GC-MS**

### **Equipment**

Analysis was conducted on an Agilent 7890A gas chromatograph (GC) coupled with an Agilent 5975C triple quadrupole mass spectrometer (inert MSD with Triple-Axis Detector, USA).

### **Gas chromatography conditions**

The sample injection volume was 1  $\mu$ L and the injection was made at 250°C injector temperature. Carrier gas was Hydrogen introduced at a flow rate of 1.25 mL/min. Hydrogen was produced by using Hydrogen generator (Hydrogen, Peak Scientific Instruments, Scotland, UK). Separation was performed on a HP-5MS capillary column (length: 30 m, internal diameter: 0.25 mm, film thickness: 0.25  $\mu$ m, USA). Oven temperature was kept at 100°C for 1 min, followed by a ramp 50°C/min to 250°C, and was finally held constant for 4 min.

### **Mass Selective Detection**

Transfer line temperature was 280°C. Electron impact ionization was performed at 70 eV energy, and at a 250°C ion source temperature. The quadrupole temperature was 150°C. The MS was operated in single ion monitoring mode.

### **Samples**

1  $\mu$ l spiked samples were injected manually. No preliminary derivatization and extraction of the spiked samples were performed.

### **Data Acquisition and Processing**

Data were acquired by Agilent Chemstation Software (USA).

Fig.S1. Structure of doublet main fragment ions of morphine: m/z 144 (a) m/z 146 (b).

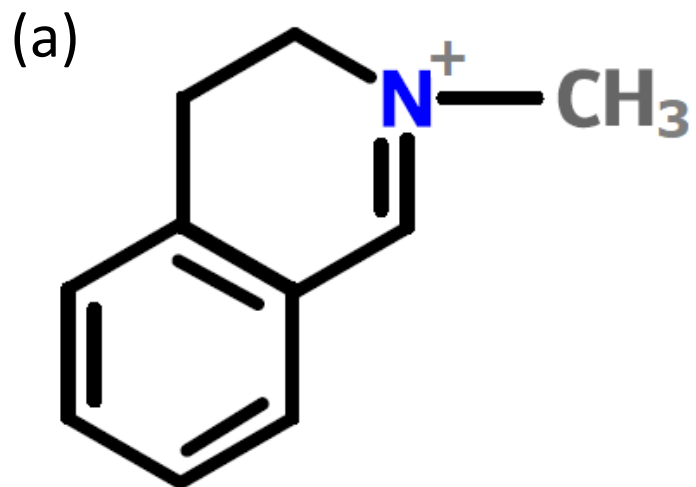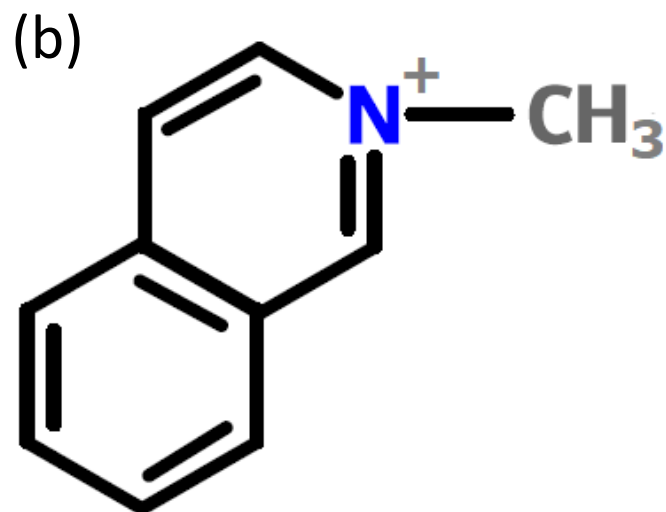

Fig.S2. Chromatogram (a) and mass spectrum of morphine spiked with blank urine (b). Concentration was 50  $\mu\text{g/mL}$ .

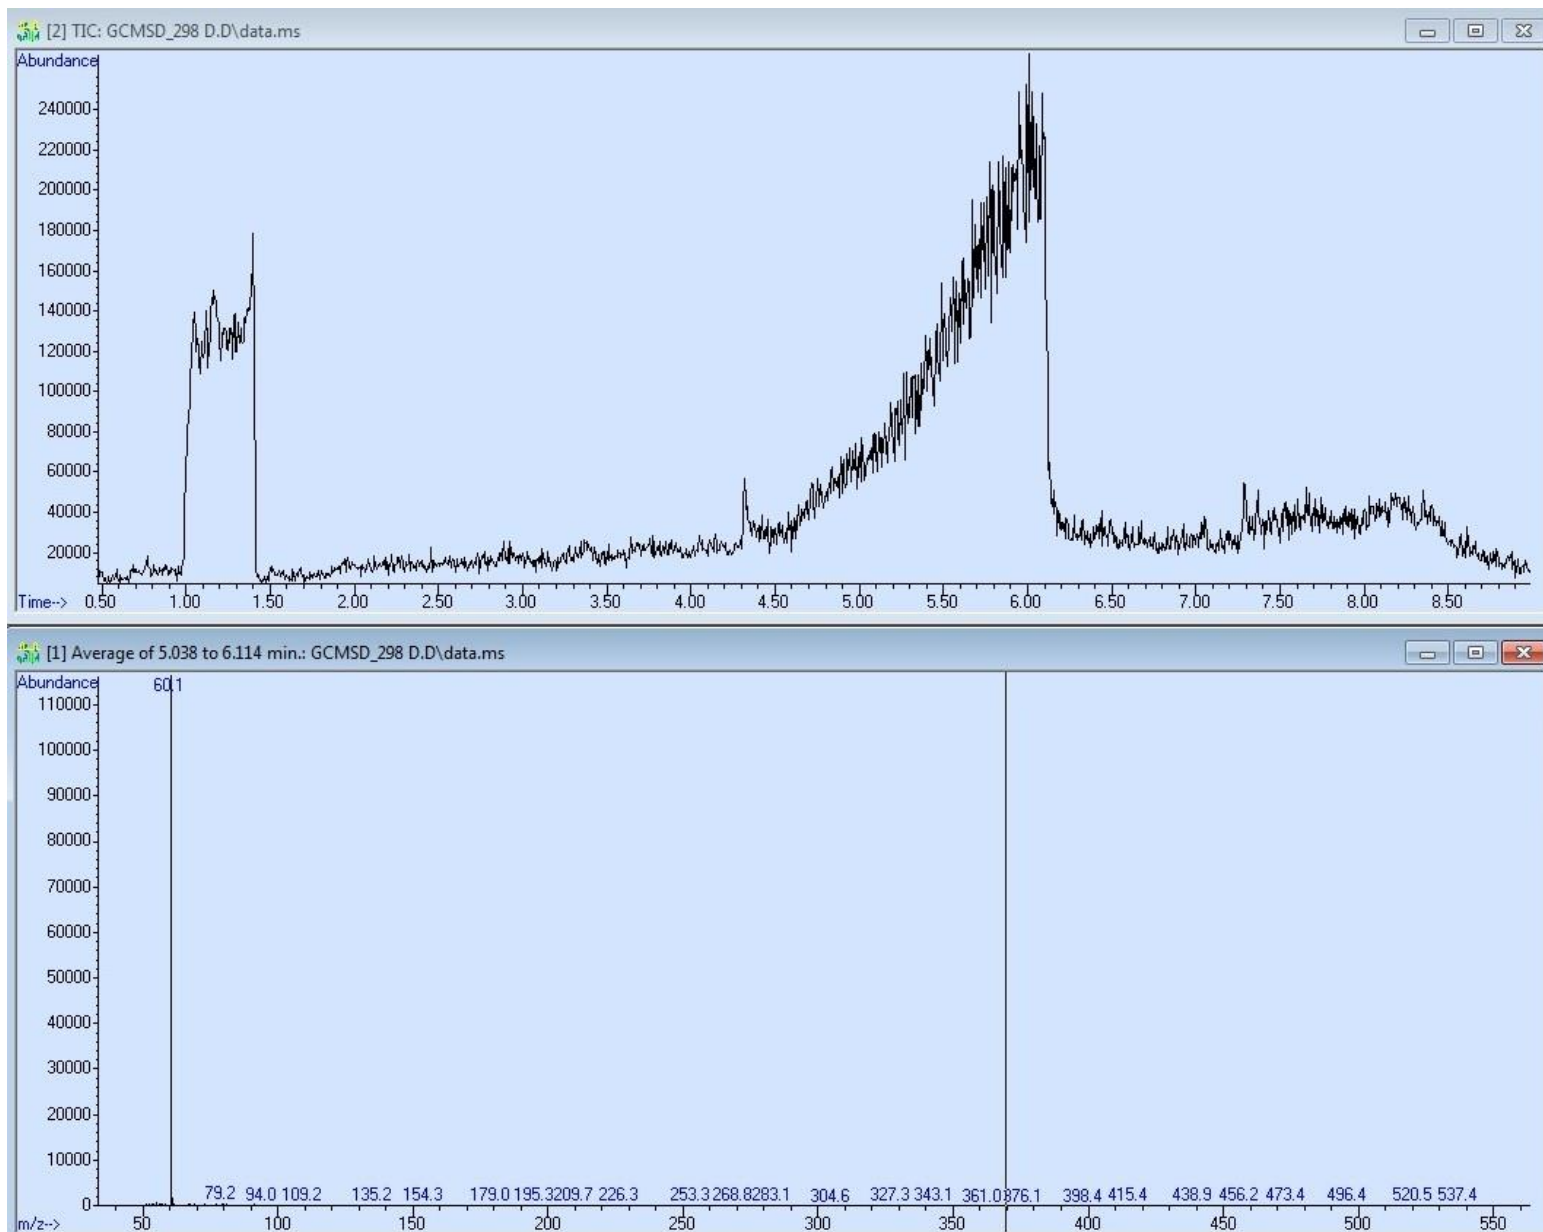

Supplement: Supplementary file 1 [file 17619080]
